# Supplementary material
Source: Springer Nature journal article supplement (https://publikationen.ub.uni-frankfurt.de/files/1906/13059_2006_1375_MOESM5_ESM.pdf)
Supplement: MOESM5 [file 13059_2006_1375_MOESM5_ESM.pdf]

## Additional data file 5

All 12 DNA microarrays were scanned with the Affymetrix scanner, and the Affymetrix Microarray Suite v5.0 was used to generate CEL image files of the microarrays. The array images were then normalised with the software dChip v1.2, and the expression levels of all 9,335 probe sets were calculated with the Perfect Match (PM) model in dChip v1.2 assuming that the total mRNA level is constant for all specific growth rates [55]. This is the standard way of normalising data.

In a whole genome study with external RNA control as normalisation reference it was demonstrated that *S. cerevisiae* in stationary phase showed an 1.8 median ratio drop in the mRNA level compared to exponential growth [58]. However, 113 ORFs, without common biological functionality, had constant expression levels during both exponential growth and stationary phase (**Table 1**). Constant was here defined as ORFs where the logarithm to the median expression level was less than 0.10 (absolute level) and the logarithm to the highest value divided by the smallest value was less than 0.05.

Table 1: A list of 113 constantly expressed ORFs in exponential growth and stationary phase based on the study by van de Peppel et al. [58].

|         |         |         |         |         |         |         |
|---------|---------|---------|---------|---------|---------|---------|
| YAL001C | YAL028W | YAL063C | YBL067C | YBL095W | YBL098W | YBR019C |
| YBR145W | YBR204C | YCL032W | YCL033C | YCL056C | YDL022W | YDL069C |
| YDL110C | YDL123W | YDL233W | YDR014W | YDR039C | YDR055W | YDR082W |
| YDR104C | YDR179C | YDR202C | YDR286C | YDR293C | YDR306C | YDR379W |
| YDR384C | YDR401W | YEL008W | YER142C | YER173W | YFL016C | YFR014C |
| YFR027W | YGL005C | YGL053W | YGL056C | YGL154C | YGL185C | YGR010W |
| YGR102C | YGR133W | YGR203W | YGR244C | YGR268C | YHR034C | YHR075C |
| YHR080C | YHR090C | YHR105W | YHR195W | YIL139C | YIL152W | YJL137C |
| YJL164C | YJL222W | YKL067W | YKL159C | YKL220C | YKR067W | YLL006W |
| YLL027W | YLR097C | YLR102C | YLR219W | YLR228C | YLR266C | YLR298C |
| YLR306W | YLR323C | YLR352W | YLR408C | YML131W | YMR065W | YMR114C |
| YMR139W | YMR149W | YMR255W | YMR325W | YNL242W | YNL286W | YNL293W |
| YNR045W | YNR073C | YOL025W | YOL036W | YOL071W | YOL081W | YOL114C |
| YOR035C | YOR054C | YOR075W | YOR084W | YOR138C | YOR148C | YOR274W |
| YOR279C | YOR316C | YOR319W | YOR377W | YOR381W | YOR386W | YPL008W |
| YPL159C | YPL181W | YPL240C | YPR008W | YPR023C | YPR082C | YPR117W |
| YPR120C |         |         |         |         |         |         |

We analysed the transcription profile of these 113 ORFs in our study (standard normalisation) and observed that 88 ORFs were down-regulated with the specific growth rate. Moreover, 42 ORFs with an expression value above 500 were on average linearly down-regulated ( $P < 0.05$ ) (**Table 2**). If the constraint about a negative slope was relaxed, an additional four genes with positive slope were included in the analysis: *YKL067W*, *YMR149W*, *YNR045W*, and *YFR014C*. Three out of these four genes were involved in macromolecule biosynthesis, and hence these discrepancies were probably due to different medium compositions between the two studies. The linear correlation between the relative transcript level  $Y$  (scaled such that  $Y = 1$  at  $\mu = 0$  for all ORFs) and the specific growth rate  $\mu$  for all 42 ORFs with negative slopes was determined. The average, linear correlation was

$$Y = 1 - (1.6312 \pm 0.4264)\mu \quad (1)$$

where 0.4264 is the standard deviation. The correlation was not sensitive to choice of  $P$ -value and the minimum expression value of 500. At  $\mu = 0^{1/h}$  mRNA is not diluted (per definition), but e.g. at  $\mu = 0.20^{1/h}$  mRNA is diluted to 67% due to the normalisation assuming constant mRNA. Inserting  $\mu = 0.02$  and  $0.33^{1/h}$ , growth rates approximating stationary phase and exponential growth, into **Equation 1** gives  $Y_{0.02}/Y_{0.33} = 2.1 \simeq 1.8$  suggesting good agreement between the current study and the study by van de Peppel et al. [58]. Thus, in order

to compensate for this dilution effect the dataset was linearly scaled so the expression level of the 42 ORFs was constant.

Table 2: 42 ORFs from **Table 1** with an expression value above 500 were linearly down-regulated ( $P < 0.05$ ) in our experiments.

|         |         |         |         |         |         |         |
|---------|---------|---------|---------|---------|---------|---------|
| YBL067C | YBR145W | YCL032W | YCL033C | YCL056C | YDL110C | YDR039C |
| YDR055W | YDR082W | YDR104C | YDR202C | YDR293C | YDR306C | YDR384C |
| YER142C | YER173W | YGL005C | YGL053W | YGL154C | YGL185C | YGR244C |
| YHR075C | YHR195W | YIL152W | YJL164C | YLR102C | YLR219W | YLR266C |
| YML131W | YMR139W | YNL293W | YOL025W | YOL071W | YOL081W | YOR035C |
| YOR054C | YOR148C | YOR279C | YOR319W | YPL159C | YPL240C | YPR008W |
